# Supplementary material
Source: Springer Nature journal article supplement (https://www.springermedizin.de/resource/supplementary/13058_2013_3362_MOESM3_ESM.pdf/9703952)
Supplement: MOESM3 [file 9703952]

**A****p-p 70S6K positive versus negative**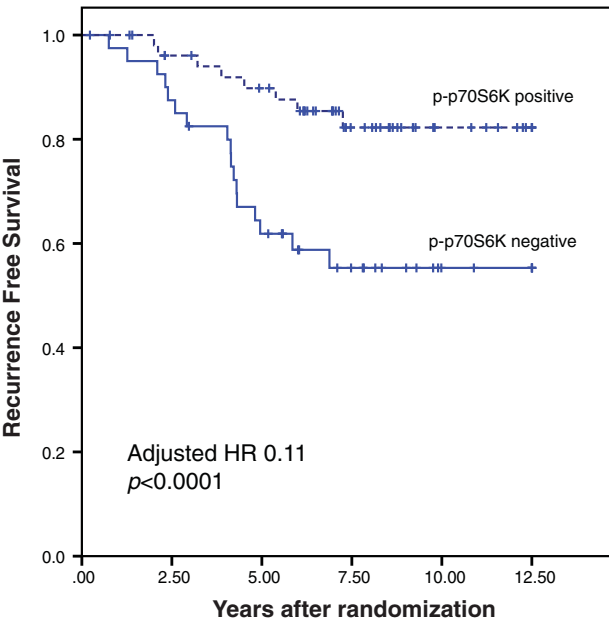

| No. at risk | 0  | 2.5 | 5.0 | 7.5 | 10.0 | 12.5 |
|-------------|----|-----|-----|-----|------|------|
| p-p70S6K(+) | 55 | 47  | 42  | 23  | 10   | 4    |
| p-p70S6K(-) | 40 | 35  | 24  | 14  | 5    | 4    |

**B****p-mTOR high( $\geq 60\%$ ) versus low( $<60\%$ )**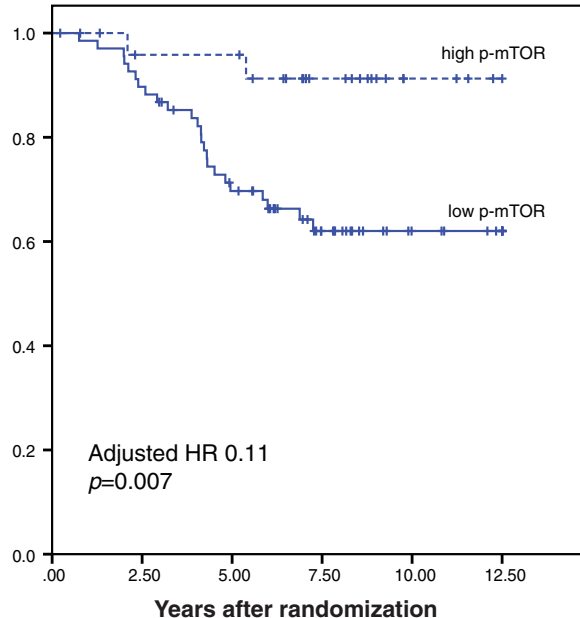

| No. at risk | 0  | 2.5 | 5.0 | 7.5 | 10.0 | 12.5 |
|-------------|----|-----|-----|-----|------|------|
| p-mTOR high | 26 | 22  | 22  | 13  | 4    | 3    |
| p-mTOR low  | 69 | 61  | 44  | 24  | 11   | 9    |
